# Supplementary material for: Loss of angiotensin-converting enzyme-related (ACER) peptidase disrupts behavioural and metabolic responses to diet in Drosophila melanogaster
Source: Oxford University Press journal article supplement (doi:10.1242/jeb.194332), 2019-01-01
Supplement: jeb194332supp.pdf [file jeb194332supp.pdf]

# Supplementary Figure 1

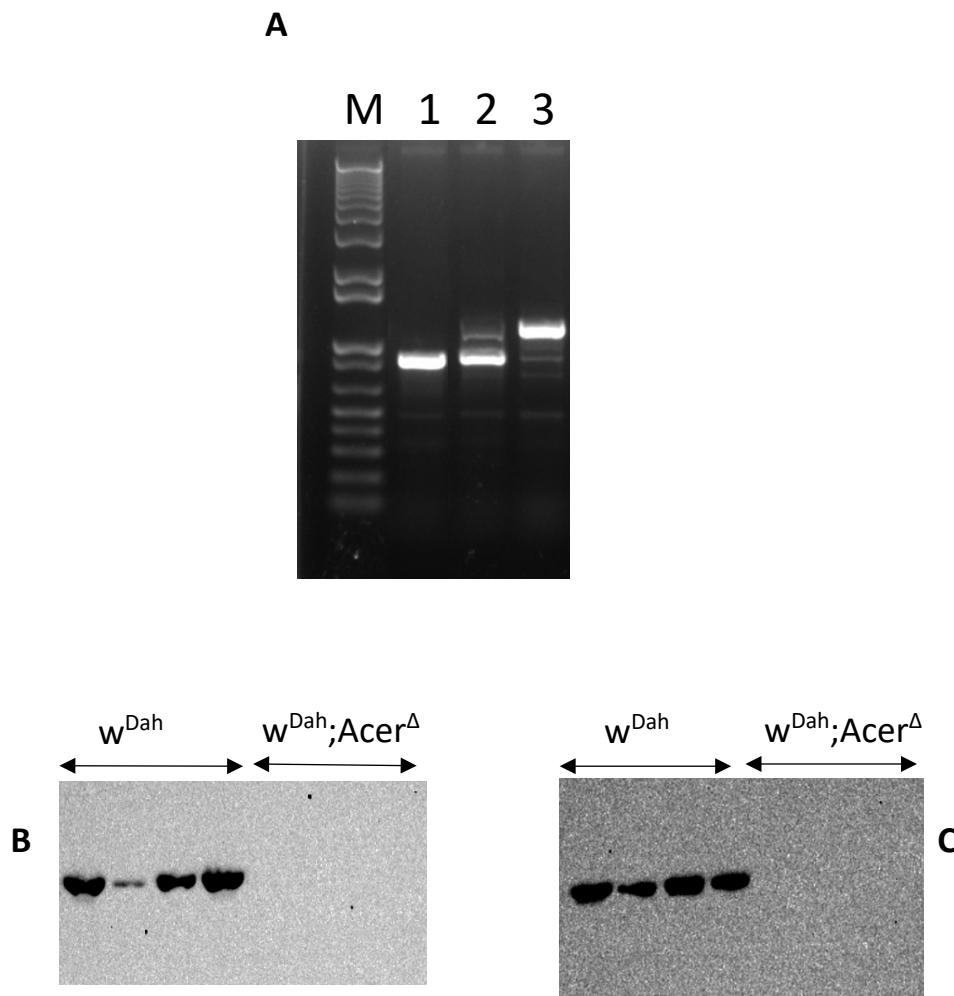

**Figure S1: (A)** PCR analysis of the *Acer* deletion in the  $w^{Dah}$  background. Lane M: marker. Lane 1: The  $Acer^{\Delta 168}$  deletion homozygote with a strong band at 850 bp. Lane 2: The  $Acer^{\Delta 168}$  deletion heterozygote with a strong band at 850 bp and a weaker band at 1,150 bp. Lane 3: The  $w^{Dah}$  control background with a strong band at 1,150 bp. (bp = base pairs). **(B-C)** Western blot analysis of the  $Acer^{\Delta 168}$  deletion in the  $w^{Dah}$  background showing absence of *Acer* protein in  $w^{Dah};Acer^{\Delta}$  males and females. Four independent protein extractions per genotype and sex were performed using 5 flies per sample. **(B)** Females. **(C)** Males.

## Supplementary Figure 2

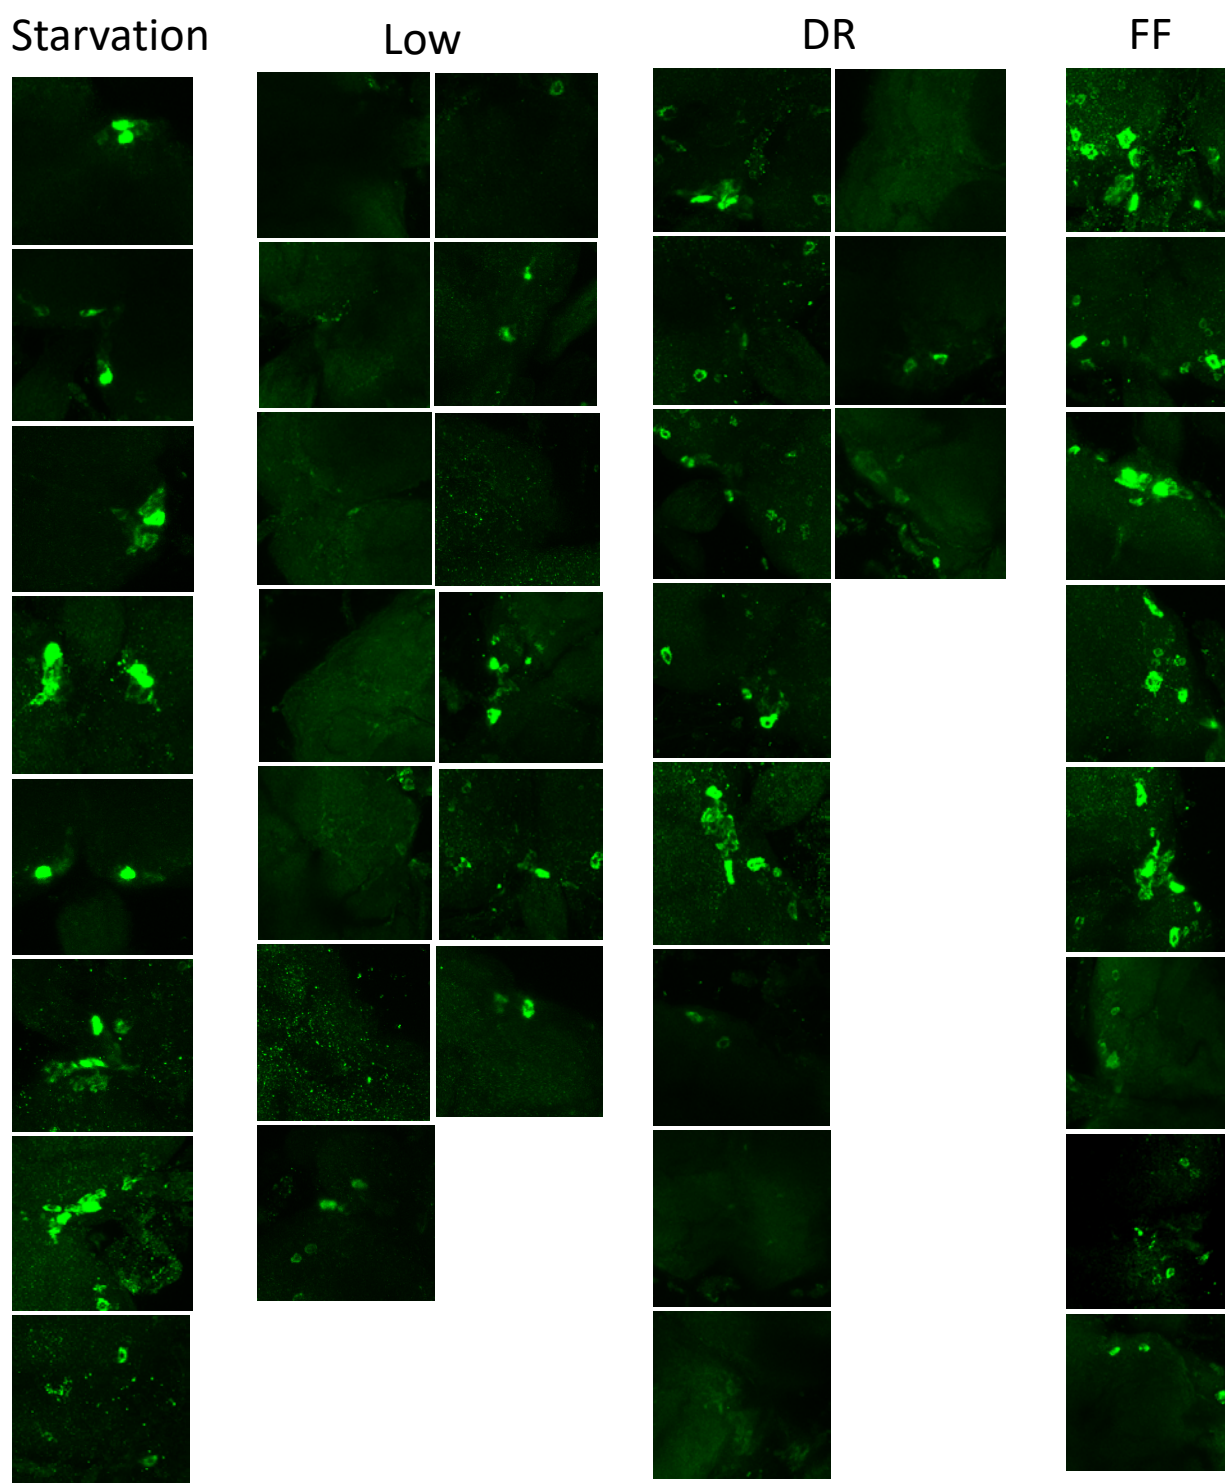

**Figure S2.** Immunohistochemical analysis of DILP5 protein in *w<sup>Dah</sup>* 10 day old female brains following 48 h treatment with Starvation, Low, DR and FF diets.

## Supplementary Figure 3

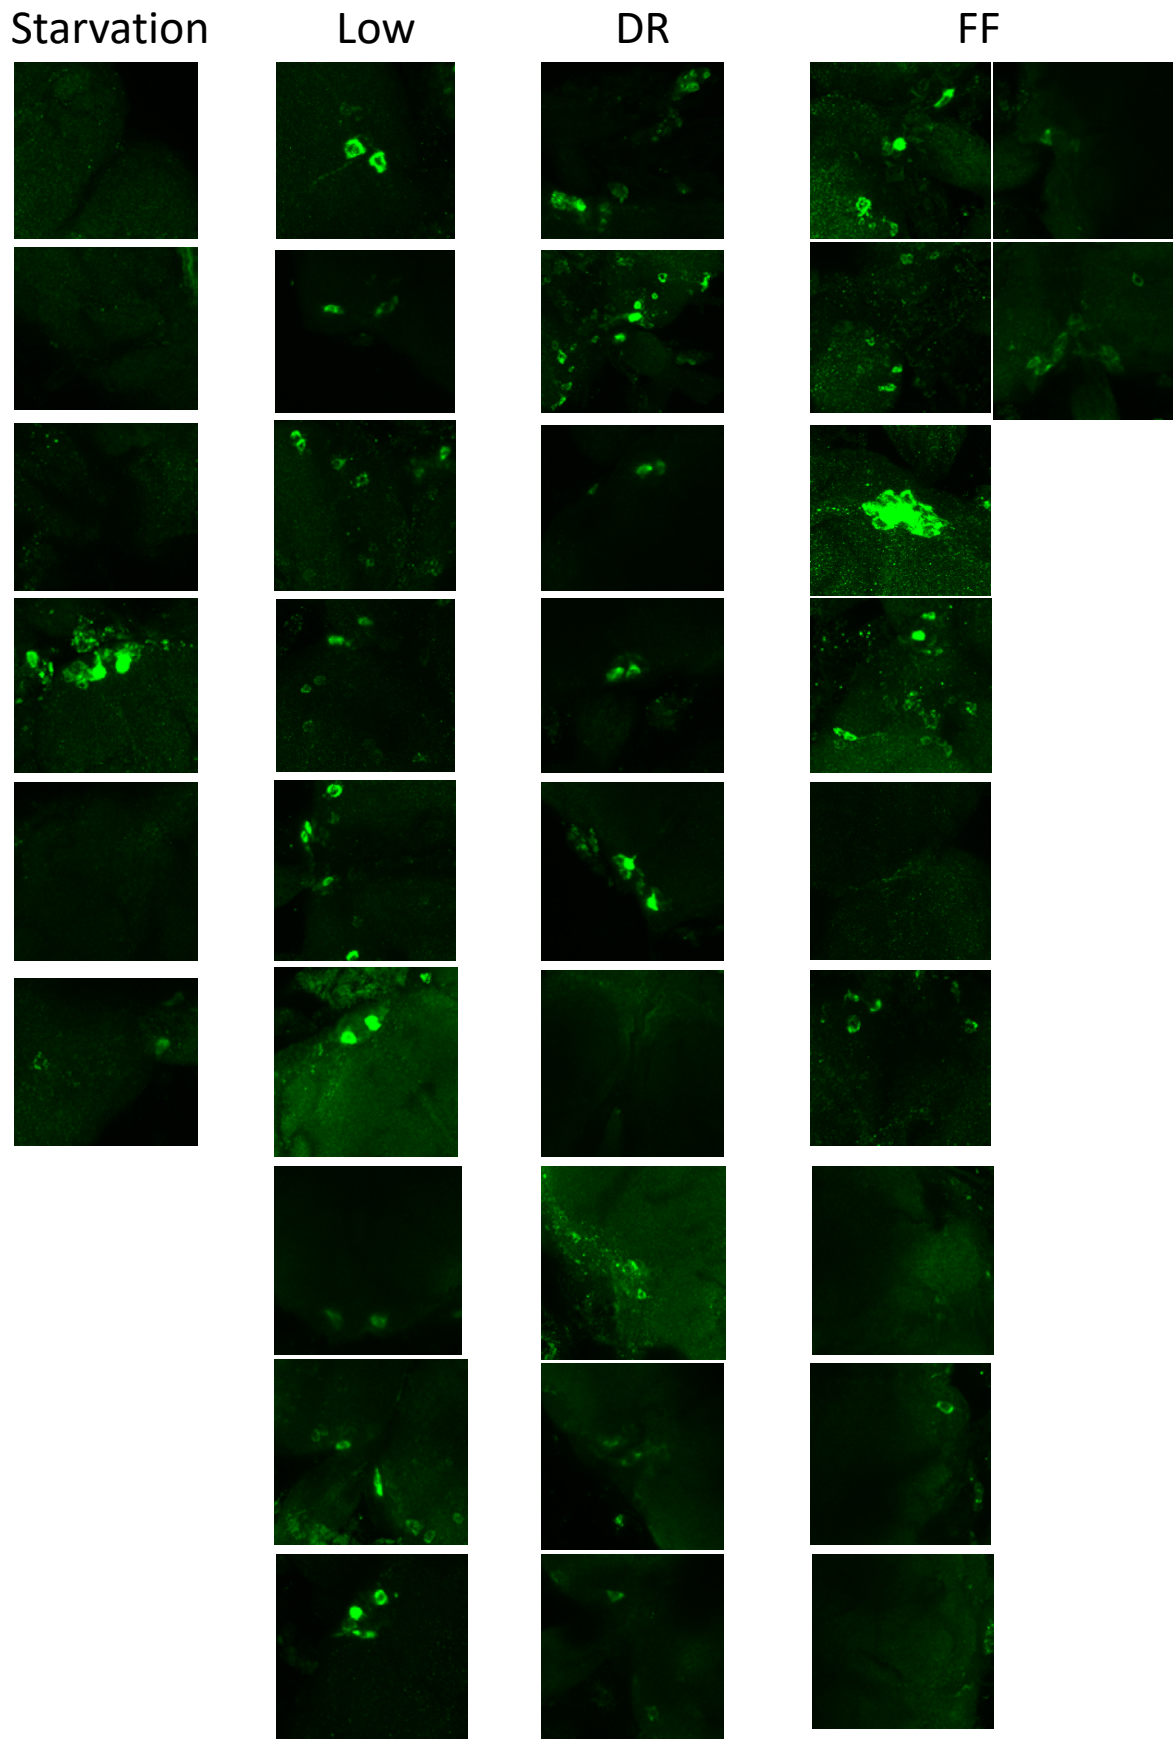

**Figure S3.** Immunohistochemical analysis of DILP5 protein in *w<sup>Dah</sup>;Acer<sup>Δ</sup>* 10 day old female brains following 48 h treatment with Starvation, Low, DR and FF diets.

**Table S1: Statistical analysis of female sleep data presented in Figure 1.** P values of planned comparisons of means for the effect of diet on sleep parameters in  $w^{Dah};Acer^{\Delta}$  and  $w^{Dah}$  females, performed using Tukey HSD. Numbers in bold indicate significant differences ( $p < 0.05$ ).

| Genotype                | Food comparison | Activity/day  | Total Sleep/day | Day-time sleep | Night-time sleep | Number of bouts | Bout duration     |
|-------------------------|-----------------|---------------|-----------------|----------------|------------------|-----------------|-------------------|
| $w^{Dah}$               | Low-DR          | 0.3932        | 0.2001          | 0.1636         | 0.4309           | <b>0.0102</b>   | 0.9681            |
|                         | Low-FF          | <b>0.0152</b> | <b>0.0004</b>   | <b>0.0003</b>  | <b>0.0212</b>    | 0.2113          | <b>0.0019</b>     |
|                         | DR-FF           | 0.2641        | 0.054           | <b>0.0497</b>  | 0.2823           | 0.3849          | <b>0.0039</b>     |
| $w^{Dah};Acer^{\Delta}$ | Low-DR          | 0.9714        | 0.6333          | 0.7747         | 0.9997           | <b>0.0053</b>   | 0.0529            |
|                         | Low-FF          | 0.1709        | 0.0799          | 0.6831         | <b>0.0054</b>    | 0.8687          | <b>0.014</b>      |
|                         | DR-FF           | 0.0702        | 0.3109          | 0.9793         | <b>0.0026</b>    | <b>0.0016</b>   | <b>&lt;0.0001</b> |

**Table S2: Statistical analysis of male sleep data presented in Figure 2.** P values of planned comparisons of means for the effect of diet on sleep parameters (Number of bouts) in  $w^{Dah};Acer^{\Delta}$  and  $w^{Dah}$  males, performed using Tukey HSD. Numbers in bold indicate significant differences ( $p < 0.05$ ).

| Genotype                | Food comparison | Number of bouts |
|-------------------------|-----------------|-----------------|
| $w^{Dah}$               | Low-DR          | <b>0.025</b>    |
|                         | Low-FF          | <b>0.0392</b>   |
|                         | DR-FF           | 0.9738          |
| $w^{Dah};Acer^{\Delta}$ | Low-DR          | 0.8802          |
|                         | Low-FF          | 0.8953          |
|                         | DR-FF           | 0.9991          |
